# Supplementary material for: Potential IFNγ Modulation of Inflammasome Pathway in Chlamydia trachomatis Infected Synovial Cells
Source: MDPI journal article supplement (doi:10.3390/life11121359), 2021-12-07

**Table S1.** Analysis of variance (two-factor ANOVA) for the mRNA expression levels of selected inflammatory genes in different times after infection as well as infection conditions.

|                               |             | <i>Sum of Squares</i> | <i>Mean squares</i> | <i>F-ratio</i> | <i>p-value</i> |
|-------------------------------|-------------|-----------------------|---------------------|----------------|----------------|
| <b>IL-1<math>\beta</math></b> | Variable A  | 3022764.84            | 1511382.42          | 95.90          | 0.000001       |
|                               | Variable B  | 2646493.40            | 1323246.70          | 83.96          | 0.000002       |
|                               | A x B       |                       |                     |                |                |
|                               | Interaction | 3007107.31            | 751776.83           | 47.70          | 0.000005       |
| <b>IL-18</b>                  | Variable A  | 2.11                  | 1.06                | 28.90          | 0.0001         |
|                               | Variable B  | 3.42                  | 1.71                | 46.70          | 0.00002        |
|                               | A x B       |                       |                     |                |                |
|                               | Interaction | 1.41                  | 0.35                | 9.62           | 0.003          |
| <b>IL-6</b>                   | Variable A  | 3111663.72            | 1555831.86          | 7.00           | 0.01           |
|                               | Variable B  | 95960684.61           | 47980342.30         | 215.91         | 0.00000002     |
|                               | A x B       |                       |                     |                |                |
|                               | Interaction | 1770463.49            | 442615.87           | 1.99           | <b>N.S.</b>    |
| <b>IL-8</b>                   | Variable A  | 0.63                  | 0.32                | 5.02           | 0.03           |
|                               | Variable B  | 1.16                  | 0.58                | 9.22           | 0.01           |
|                               | A x B       |                       |                     |                |                |
|                               | Interaction | 5.93                  | 1.48                | 23.47          | 0.0001         |
| <b>Caspase-1</b>              | Variable A  | 930357.71             | 465178.86           | 32.12          | 0.0001         |
|                               | Variable B  | 4016302.96            | 2008151.48          | 138.66         | 0.0000002      |
|                               | A x B       |                       |                     |                |                |
|                               | Interaction | 574740.66             | 143685.17           | 9.92           | 0.002          |

Variable A, hours post infection (6, 18 and 24 h.p.i.); Variable B, infection conditions (Synovial cells infected with *C. trachomatis*, *Chlamydia* infected cells pre-treated with IFN $\gamma$  and uninfected cells pre-treated with IFN $\gamma$ ); N.S., Not Significant.

**Table S2.** Analysis of variance (two-factor ANOVA) for the protein levels, via ELISA, of selected cytokines in different times after infection and infection conditions.

|                               |                   | <i>Sum of Squares</i> | <i>Mean squares</i> | <i>F-ratio</i> | <i>p-value</i> |
|-------------------------------|-------------------|-----------------------|---------------------|----------------|----------------|
| <b>IL-1<math>\beta</math></b> | Variable A        | 10678.46              | 5339.23             | 44.00          | 0.00002        |
|                               | Variable B        | 15530.99              | 7765.49             | 63.99          | 0.000005       |
|                               | A x B Interaction | 20855.96              | 5213.99             | 42.97          | 0.00001        |
| <b>IL-18</b>                  | Variable A        | 0.09                  | 0.047               | 2.77           | <b>N.S.</b>    |
|                               | Variable B        | 0.42                  | 0.21                | 12.43          | 0.003          |
|                               | A x B Interaction | 0.16                  | 0.04                | 2.39           | <b>N.S.</b>    |
| <b>IL-6</b>                   | Variable A        | 30.51                 | 15.25               | 43.15          | 0.00002        |
|                               | Variable B        | 11.28                 | 5.64                | 15.94          | 0.001          |
|                               | A x B Interaction | 7.73                  | 1.93                | 5.46           | 0.02           |
| <b>IL-8</b>                   | Variable A        | 22.11                 | 11.05               | 25.64          | 0.0002         |
|                               | Variable B        | 22.35                 | 11.17               | 25.91          | 0.0002         |
|                               | A x B Interaction | 42.28                 | 10.57               | 24.51          | 0.0001         |

Variable A, hours post infection (6, 18 and 24 h.p.i.); Variable B, infection conditions (Synovial cells infected with *C. trachomatis*, Chlamydia infected cells treated with IFN $\gamma$  and uninfected cells treated with IFN $\gamma$ ); N.S., Not Significant.

**Figure S1.** Fluorescence microscopy pictures of *C. trachomatis* inclusion morphology in primary human synovial cells. Cells were infected with *C. trachomatis* at a MOI of 1.0 and stained with a FITC-conjugated anti-*C. trachomatis* MOMP monoclonal antibody (Chlamydia Cell kit, Cellabs, Sydney, AU), as described in Materials and Methods. All pictures were taken at 36 h.p.i.

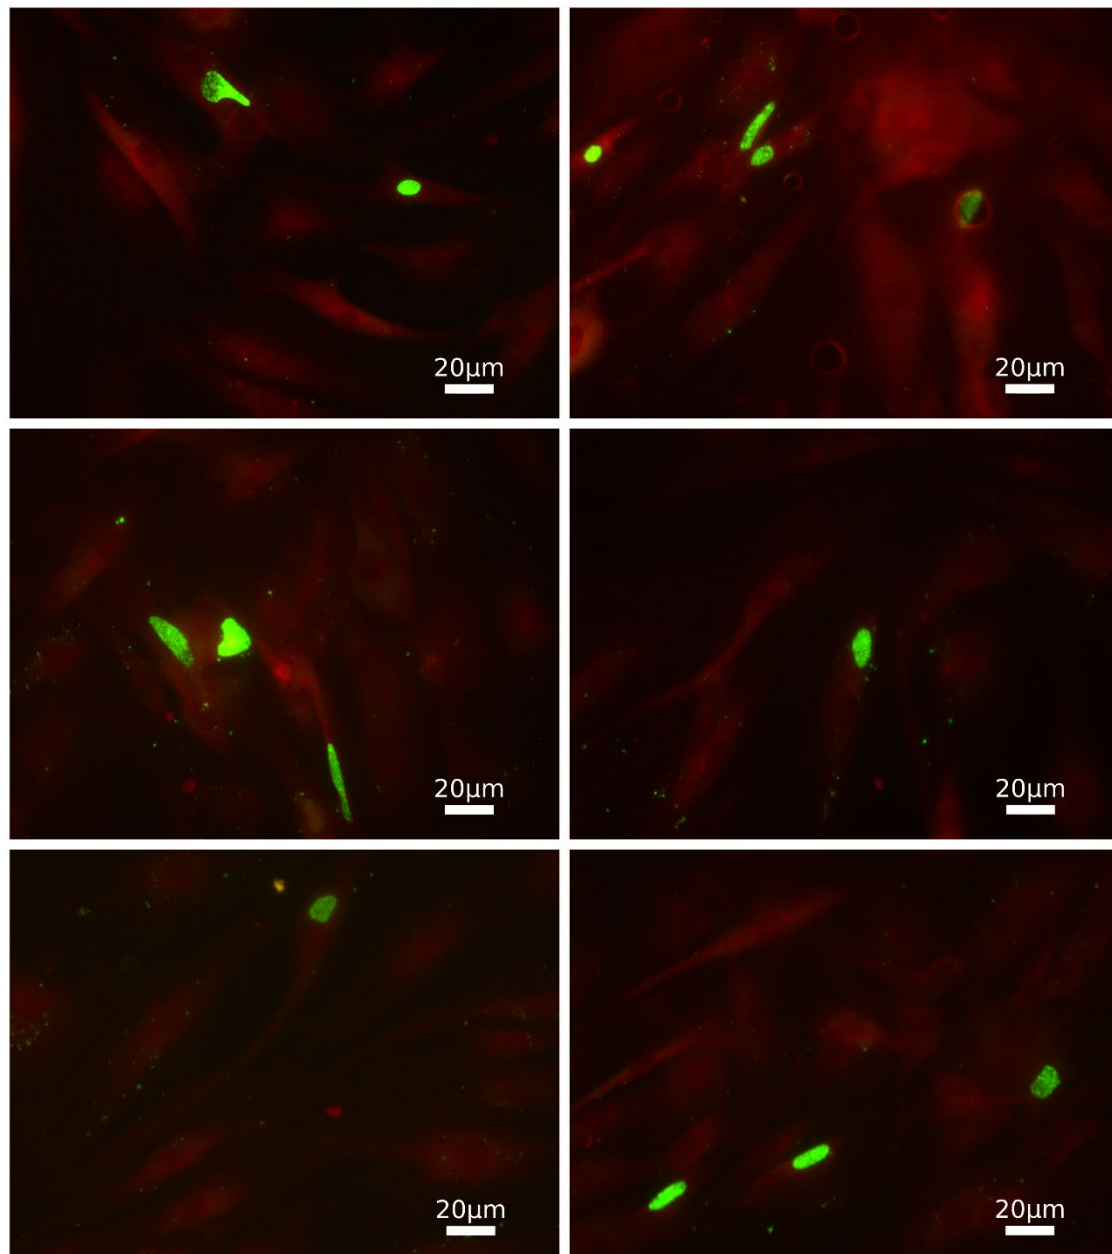

**Figure S2.** Fluorescence microscopy pictures of *C. trachomatis* inclusions in primary human synovial cells. Cells were infected with *C. trachomatis* at a MOI of 1.0 and stained with the primary antibody anti-*C. trachomatis* LPS monoclonal antibody (Mab29, CT601, Chlamydia Biobank, UK) combined with a goat anti-Mouse IgG antibody conjugated with Alexa Fluor Plus-488 (Invitrogen, Thermo Fisher Scientific, USA). Wheat Germ Agglutinin conjugated with Alexa Fluor-594 (Invitrogen, Thermo Fisher Scientific, USA) was used for counterstaining cell monolayer. All pictures were taken at 36 h.p.i.

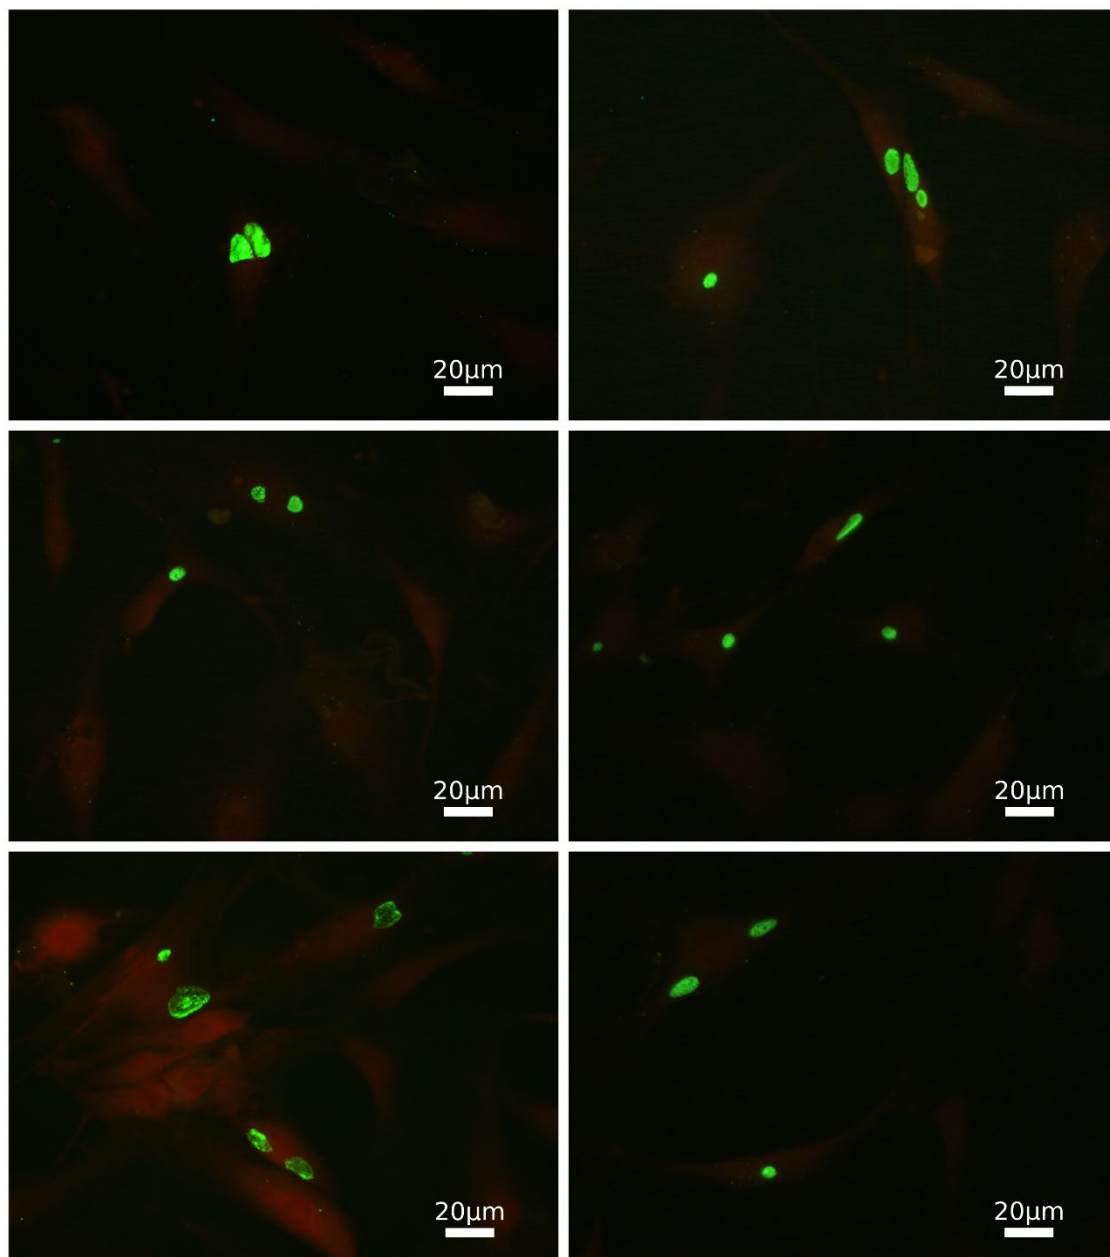

**Figure S3.** Effect of pan-caspase inhibitor Z-VAD-FMK on primary human synovial cell viability. **(a)** MTT assay; **(b)** Viable cell count assay.

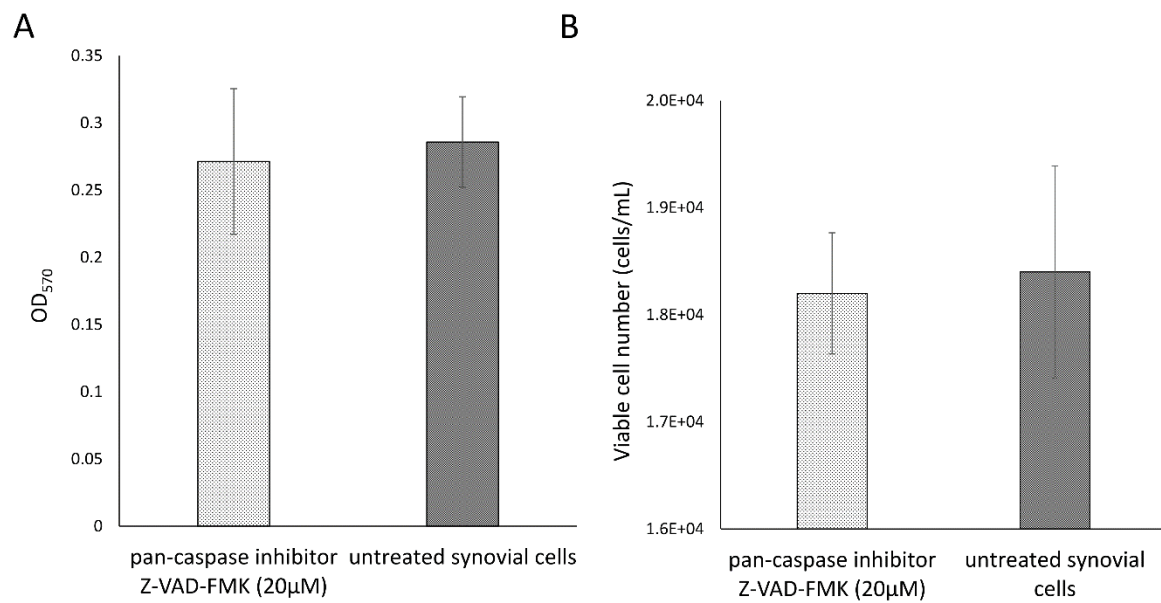

Supplement: s1 [file s1]
